# Supplementary material for: Small airway function measured using forced expiratory flow between 25% and 75% of vital capacity and its relationship to airflow limitation in symptomatic ever-smokers: a cross-sectional study
Source: PubMed Central journal article supplement — BMJ Open Respir Res. 2022 Oct 6;9(1):e001385. doi: 10.1136/bmjresp-2022-001385 (PMC9540854; doi:10.1136/bmjresp-2022-001385), 2022-10-06
Supplement: bmjresp-2022-001385supp001.pdf [file bmjresp-2022-001385supp001.pdf]

**Small airway function measured using forced expiratory flow between 25% and 75% of vital capacity and its relationship to airflow limitation in symptomatic ever-smokers: A cross-sectional study**

Nowaf Y. Alobaidi, Mohammed A. Almeshari, James A. Stockley, Robert A. Stockley, Elizabeth Sapey

**Online Supplement**

## Supplementary Tables

**Table E1. List of medications used in the included participants**

| Variable           | Total<br>n= 1458 | Normal FEF <sub>25-75</sub> /AL-<br>n = 316 | Low FEF <sub>25-75</sub> /AL-<br>n = 335 | Low FEF <sub>25-75</sub> /AL+<br>n = 806 |
|--------------------|------------------|---------------------------------------------|------------------------------------------|------------------------------------------|
| SABA               | 891 (61.1)       | 128 (40.5)                                  | 186 (55.7)*                              | 576 (71.4)*†                             |
| SAMA               | 51 (3.5)         | 2 (0.6)                                     | 10 (3)                                   | 39 (4.8)*                                |
| SABA/SAMA          | 1 (0.1)          | 0 (0)                                       | 0 (0)                                    | 1 (0.1)                                  |
| ICS                | 85 (5.8)         | 17 (5.4)                                    | 22 (6.6)                                 | 45 (5.6)                                 |
| LABA               | 24 (1.6)         | 1 (0.3)                                     | 3 (0.9)                                  | 20 (2.5)*                                |
| ICS/LABA           | 405 (27.8)       | 33 (10.4)                                   | 70 (21)*                                 | 302 (37.4)*†                             |
| LAMA               | 353 (24.2)       | 20 (6.3)                                    | 47 (14.1)*                               | 286 (35.4)*†                             |
| LABA/LAMA          | 36 (2.5)         | 2 (0.6)                                     | 9 (2.7)                                  | 25 (3.1)                                 |
| ICS/LABA/LAMA      | 7 (0.5)          | 0 (0)                                       | 0 (0)                                    | 7 (0.9)                                  |
| Systematic CS      | 55 (3.8)         | 2 (0.6)†‡                                   | 15 (4.5)                                 | 38 (4.7)                                 |
| Antibiotic         | 28 (1.9)         | 1 (0.3)                                     | 8 (2.4)                                  | 19 (2.4)                                 |
| Montelukast        | 25 (1.7)         | 3 (0.9)                                     | 4 (1.2)                                  | 18 (2.2)                                 |
| CV Medications     | 687 (47.1)       | 183 (57.9)†‡                                | 160 (47.9)                               | 343 (42.5)                               |
| GI Medications     | 381 (26.1)       | 97 (30.7)                                   | 96 (28.7)                                | 187 (23.2)*                              |
| Domiciliary Oxygen | 19 (1.3)         | 2 (0.6)                                     | 5 (1.5)                                  | 12 (1.5)                                 |
| Mucolytic          | 101 (6.9)        | 3 (0.9)                                     | 14 (4.2)*                                | 88 (10.9)*†                              |
| Theophylline       | 15 (1.0)         | 0 (0)                                       | 1 (0.3)                                  | 14 (1.7)                                 |

**Legend:** Data is presented in n (%); \*Significantly different from group 1; †Significantly different from group 2; ‡Significantly different from group 3. Significance level was set at  $P < 0.05$

**Abbreviations:** FEF<sub>25-75</sub>, forced expiratory flow between 25% and 75% of vital capacity; AL, airflow limitation; SABA, short-acting beta-2 agonist; SAMA, short-acting muscarinic antagonist; ICS, inhaled corticosteroid; LABA, long-acting beta-2 agonist; LAMA, long-acting muscarinic antagonist; CS, corticosteroid; CV, Cardiovascular; GI, gastrointestinal.

**Table E2. List of medications used across airflow limitation severity.**

| Variable                  | Mild<br><i>n</i> = 178 | Moderate<br><i>n</i> = 111 | Moderately severe<br><i>n</i> = 120 | Severe<br><i>n</i> = 263 | Very severe<br><i>n</i> = 135 |
|---------------------------|------------------------|----------------------------|-------------------------------------|--------------------------|-------------------------------|
| <b>Medications (n, %)</b> |                        |                            |                                     |                          |                               |
| SABA                      | 103 (57.9)             | 77 (69.4)                  | 83 (69.2)                           | 197 (74.9)*              | 116 (85.9)**‡                 |
| SAMA                      | 5 (2.8)                | 4 (3.6)                    | 7 (5.8)                             | 15 (5.7)                 | 8 (5.9)                       |
| SABA/SAMA                 | 0 (0)                  | 0 (0)                      | 0 (0)                               | 1 (0.4)                  | 0 (0)                         |
| ICS                       | 10 (5.6)               | 5 (4.5)                    | 6 (5)                               | 17 (6.5)                 | 8 (5.9)                       |
| LABA                      | 4 (2.2)                | 2 (1.8)                    | 2 (1.7)                             | 9 (3.4)                  | 3 (2.2)                       |
| ICS/LABA                  | 43 (24.2)              | 29 (26.1)                  | 41 (34.2)                           | 112 (42.6)**†            | 77 (57)**‡                    |
| LAMA                      | 40 (22.5)              | 40 (36)                    | 29 (24.2)                           | 114 (43.3)               | 63 (46.7)**‡                  |
| LABA/LAMA                 | 3 (1.7)                | 4 (3.6)                    | 1 (0.8)                             | 12 (4.6)                 | 5 (3.7)                       |
| ICS/LABA/LAMA             | 1 (0.6)                | 1 (0.9)                    | 1 (0.8)                             | 1 (0.4)                  | 3 (2.2)                       |
| Systematic CS             | 6 (3.4)                | 4 (3.6)                    | 6 (5)                               | 14 (5.3)                 | 8 (5.9)                       |
| Mucolytic                 | 10 (5.6)               | 8 (7.2)                    | 8 (6.7)                             | 36 (13.7)                | 26 (19.3)**‡                  |
| Antibiotic                | 1 (0.6)                | 2 (1.8)                    | 3 (2.5)                             | 7 (2.7)                  | 6 (4.4)                       |
| Montelukast               | 1 (0.6)                | 0 (0)                      | 2 (1.7)                             | 9 (3.4)                  | 6 (4.4)                       |
| CV Medications            | 89 (50)                | 44 (39.6)                  | 60 (50)                             | 109 (41.4)               | 41 (30.4)**‡                  |
| GI Medications            | 44 (24.7)              | 36 (32.4)                  | 30 (25)                             | 56 (21.3)                | 22 (16.3)†                    |
| Domiciliary Oxygen        | 0 (0)                  | 4 (3.6)                    | 1 (0.8)                             | 4 (1.5)                  | 3 (2.2)                       |
| Theophylline              | 0 (0)                  | 1 (0.9)                    | 1 (0.8)                             | 7 (2.7)                  | 5 (3.7)                       |

**Legend:** Data is presented in n (%). \*Significantly different from mild; †Significantly different from moderate; ‡Significantly different from moderately severe; §Significantly different from severe. Significance level was set at  $p < 0.05$ .

**Abbreviations:** SABA, short-acting beta-2 agonist; SAMA, short-acting muscarinic antagonist; ICS, inhaled corticosteroid; LABA, long-acting beta-2 agonist; LAMA, long-acting muscarinic antagonist; CS, corticosteroid; CV, Cardiovascular; GI, gastrointestinal

**Table E3. The relationship of FEF<sub>25-75</sub> and FEF<sub>25-75</sub>/FVC with spirometric measures (n=1458)**

| Spirometric measures           | FEF <sub>25-75</sub> % predicted |                | FEF <sub>25-75</sub> /FVC |                |
|--------------------------------|----------------------------------|----------------|---------------------------|----------------|
|                                | r <sup>2</sup>                   | <i>P</i> value | r <sup>2</sup>            | <i>P</i> value |
| FEV <sub>1</sub> (% predicted) | 0.71                             | <0.001         | 0.47                      | <0.001         |
| FVC (% predicted)              | 0.13                             | <0.001         | 0.006                     | <0.001         |
| FEV <sub>1</sub> /FVC (%)      | 0.83                             | <0.001         | 0.92                      | <0.001         |
| FEV <sub>3</sub> /FVC (%)      | 0.70                             | <0.001         | 0.82                      | <0.001         |

**Legend:** This tables presents the relationship of FEF<sub>25-75</sub> % predicted and FEF<sub>25-75</sub>/FVC with other spirometric measures. The relationship was assessed using curvilinear regression analysis.

**Abbreviations:** FEF<sub>25-75</sub>, forced expiratory flow between 25% and 75% of vital capacity; FEV<sub>1</sub>, forced expiratory volume in the first second; FVC, forced vital capacity; FEV<sub>3</sub>, forced expiratory volume in three seconds.

## Supplementary Figures

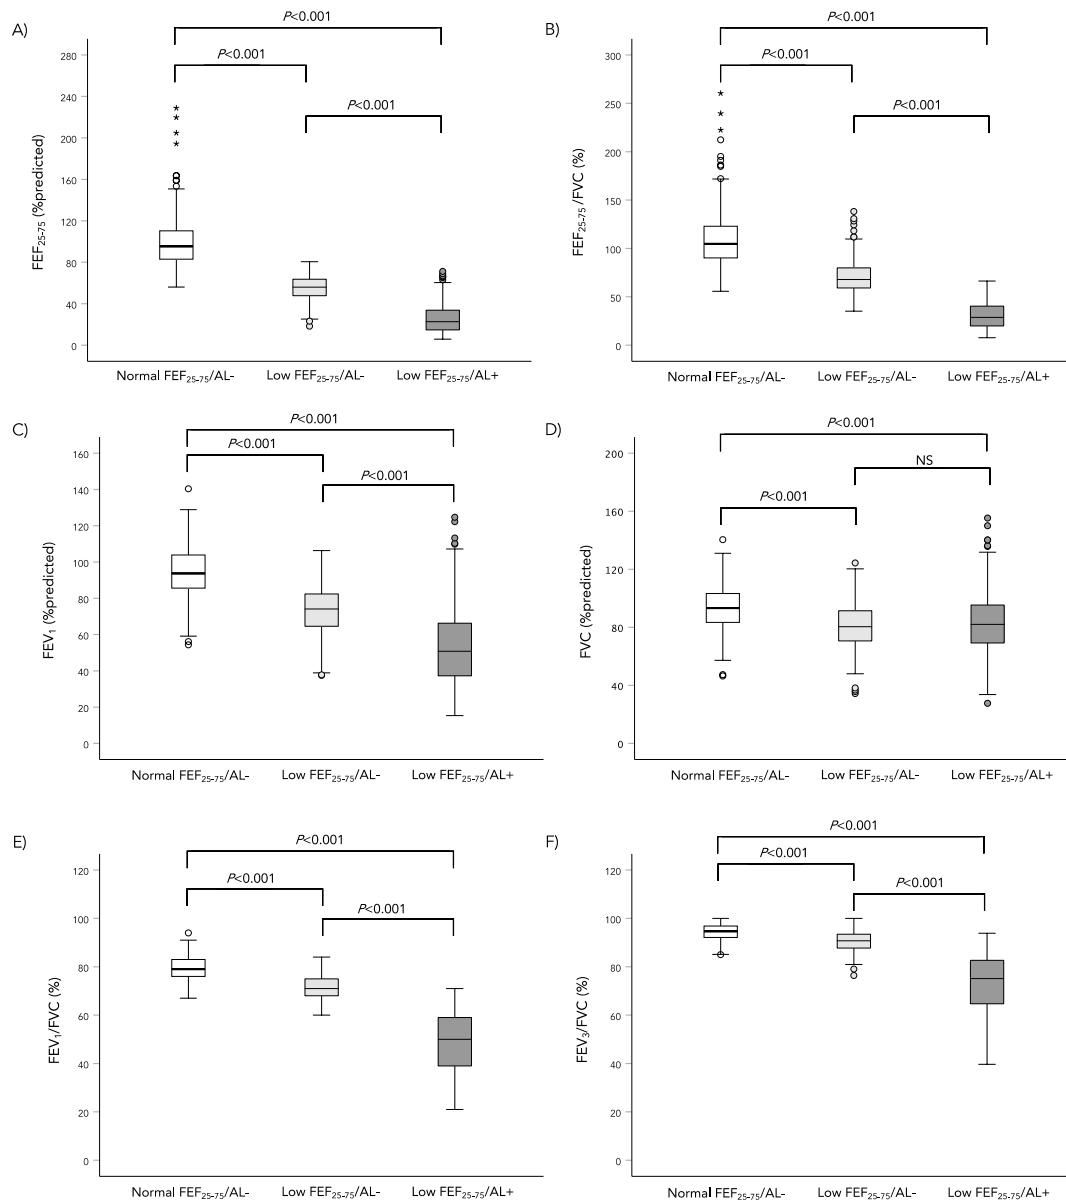

**Figure E1. Distribution of % predicted or ratio of spirometric measures across study groups.**

**Legend:** A box plot demonstrating the distribution of the % predicted or ratio of spirometric measures across study groups. The plot shows median, interquartile range, minimum and maximum. A) The distribution of

FEF<sub>25-75</sub> % predicted across groups. B) The distribution of FEF<sub>25-75</sub>/FVC ratio across groups. C) The distribution of FEV<sub>1</sub> % predicted across groups. D) The distribution of FVC % predicted across groups. E) The distribution of FEV<sub>1</sub>/FVC ratio across groups. F) The distribution of FEV<sub>3</sub>/FVC ratio across groups. For groups' comparisons, Kruskal-Wallis H test was performed, and for statistically significant test, a post-hoc Dunn's test was applied. The presented *P* values were adjusted using the Bonferroni method to account for multiple comparisons. For figures A and E, statistical test was only done for differences between groups where a definition did cause the variable to differ, and the reported p-values are for the Mann-Whitney U test. For figures B, C, D and F, the presented p-values are for post-hoc Dunn's test, and the Kruskal Wallis tests p-values for all figures were <0.001.

**Abbreviations:** FEV<sub>1</sub>, forced expiratory volume in 1 second; FVC, forced vital capacity; FEF<sub>25-75</sub>, forced expiratory flow between 25% and 75% of vital capacity; FEV<sub>3</sub>, forced expiratory volume in the first 3 seconds; AL, airflow limitation; NS, not significant.

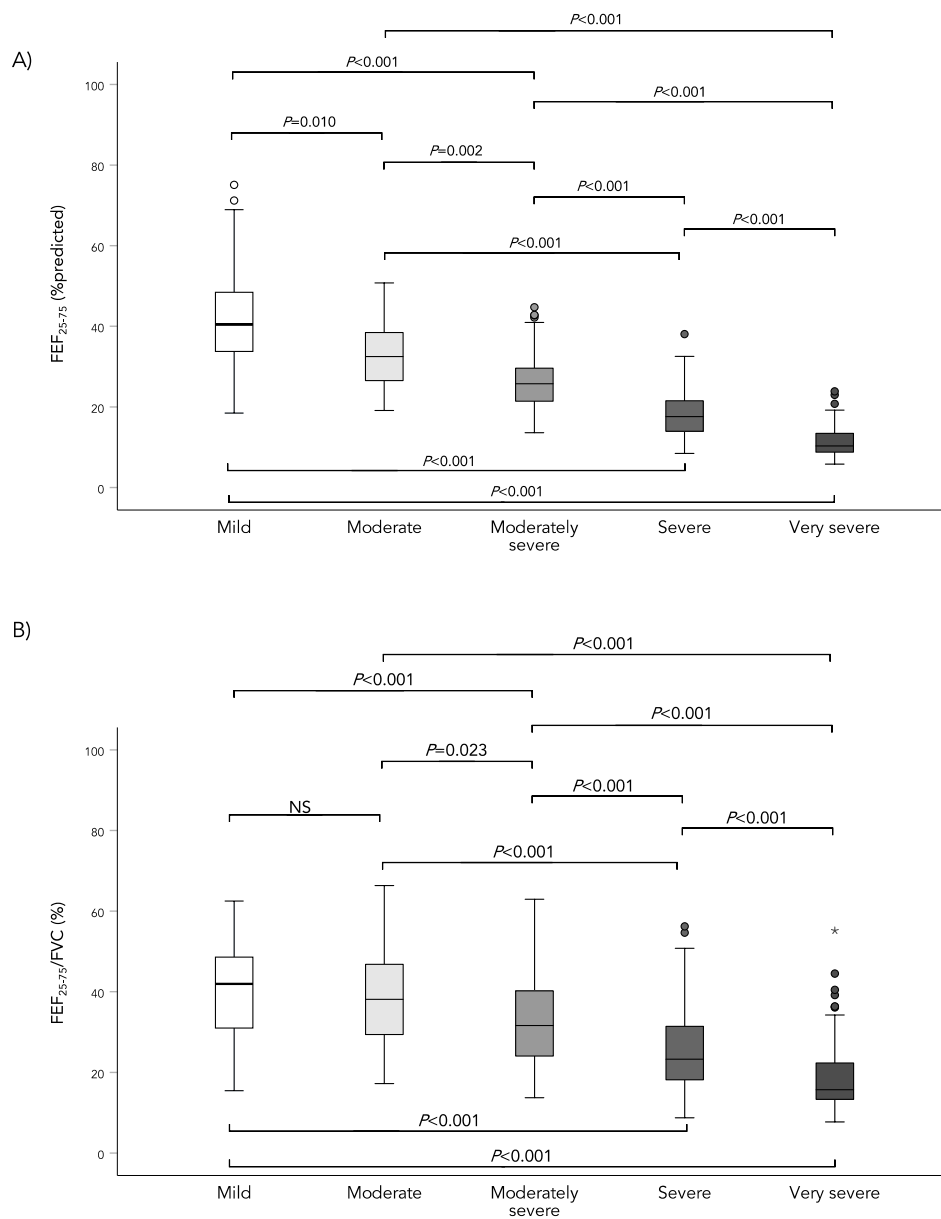

**Figure E2. Distribution of FEF<sub>25-75</sub> and FEF<sub>25-75</sub>/FVC across AL severity.**

**Legend:** A box plot demonstrating the distribution of FEF<sub>25-75</sub> and FEF<sub>25-75</sub>/FVC across AL severity. The plot shows median, interquartile range, minimum and maximum. A) The distribution of FEF<sub>25-75</sub> % predicted across severity. B) The distribution of FEF<sub>25-75</sub>/FVC ratio across severity. AL severity was assessed using FEV<sub>1</sub> z-score. For groups' comparisons, Kruskal-Wallis H tests was performed, and for statistically significant test, a

post-hoc Dunn's test was applied. The presented  $P$  values were adjusted using the Bonferroni method to account for multiple comparisons. The  $p$ -values for Kruskal-Wallis H tests for both figures were  $<0.001$ .

**Abbreviations:** FEF<sub>25-75</sub>, forced expiratory flow between 25% and 75% of vital capacity; FVC, forced vital capacity; NS, not significant; AL, airflow limitation.

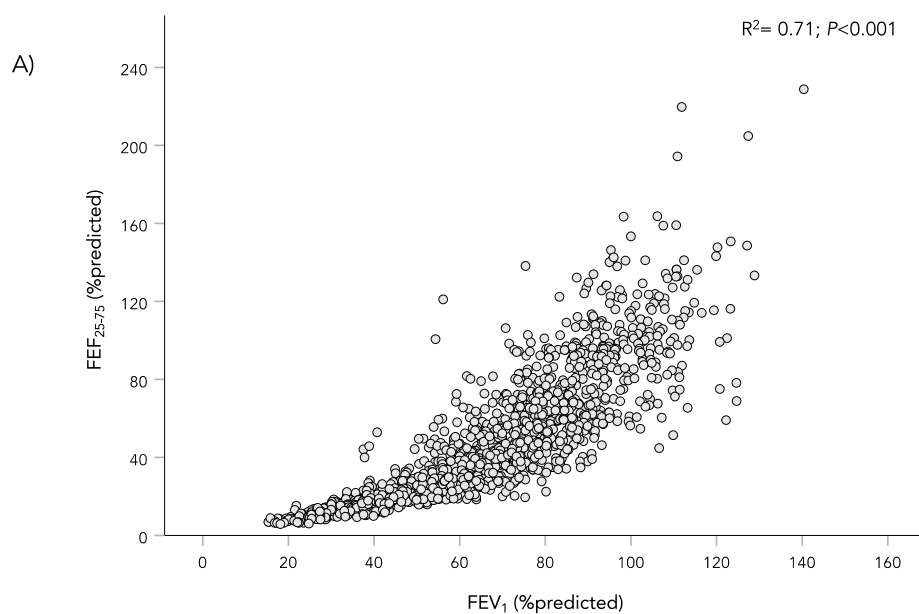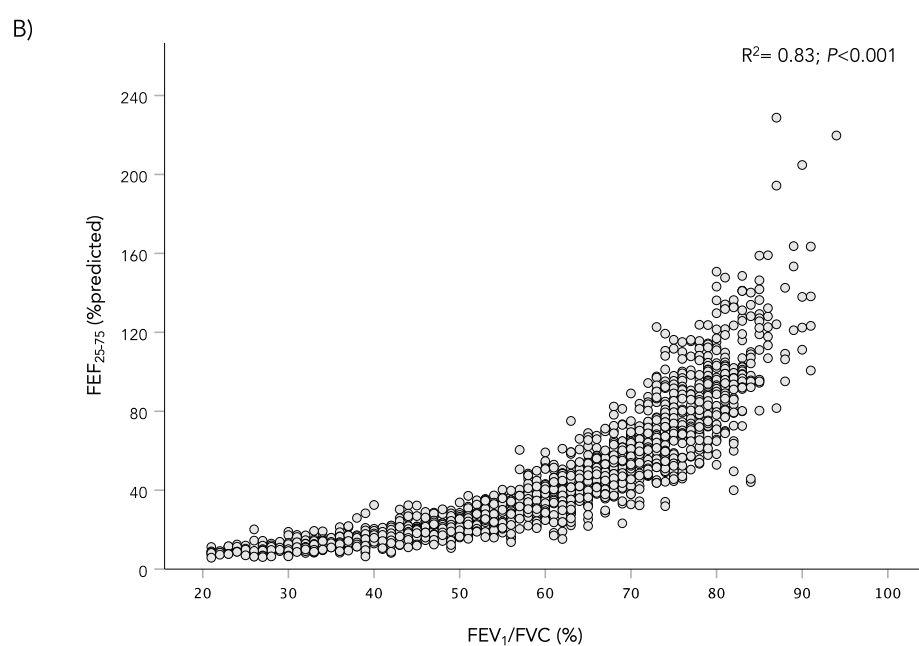

**Figure E3. FEV<sub>1</sub> % predicted and FEV<sub>1</sub>/FVC plotted against FEF<sub>25-75</sub> % predicted.**

**Legend:** A) A scatter plot showing the relationship between FEF<sub>25-75</sub> % predicted and FEV<sub>1</sub> % predicted. B) A scatter plot showing the relationship between FEF<sub>25-75</sub> % predicted and FEV<sub>1</sub>/FVC %. The coefficient of determination ( $r^2$ ) for the curvilinear regression is shown in the figure along with its  $P$  value.

**Abbreviations:** FEF<sub>25-75</sub>, forced expiratory flow between 25% and 75% of vital capacity; FEV<sub>1</sub>, forced expired volume in the first second; FVC, forced vital capacity.



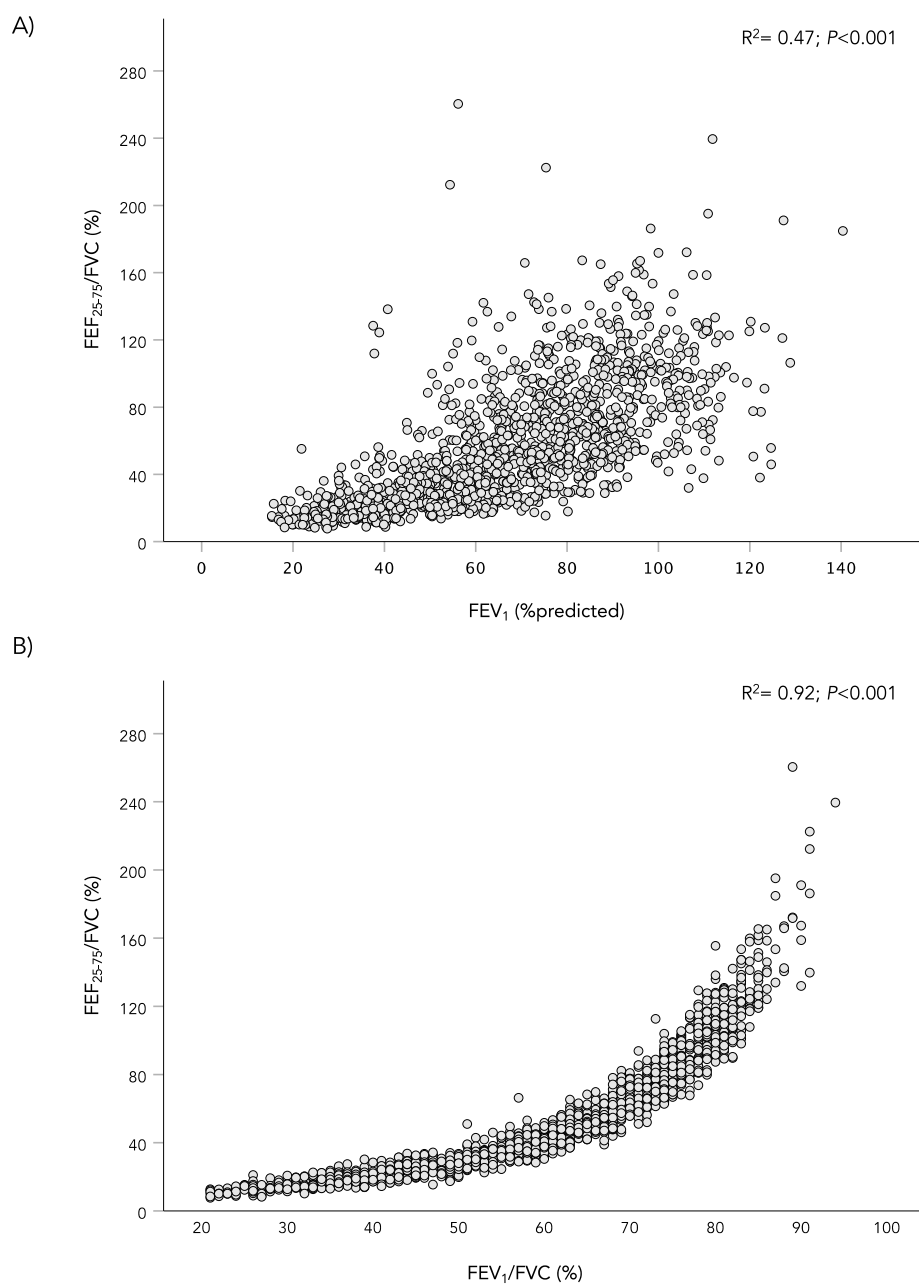

**Figure E4. FEV<sub>1</sub> % predicted and FEV<sub>1</sub>/FVC plotted against FEF<sub>25-75</sub>/FVC.**

**Legend:** A) A scatter plot showing the relationship between FEF<sub>25-75</sub>/FVC and FEV<sub>1</sub> % predicted. B) A scatter plot showing the relationship between FEF<sub>25-75</sub>/FVC and FEV<sub>1</sub>/FVC. The coefficient of determination ( $r^2$ ) for the curvilinear regression is shown in the figure along with its  $P$  value.

**Abbreviations:** FEF<sub>25-75</sub>, forced expiratory flow between 25% and 75% of vital capacity; FEV<sub>1</sub>, forced expired volume in the first second; FVC, forced vital capacity.
